# Supplementary material
Source: HighWire-hosted journal article supplement (https://heart.bmj.com/content/108/21/1722)
Supplement: inline-supplementary-material-1 [file inline-supplementary-material-1.pdf]

## SUPPLEMENTAL MATERIALS

### Supplemental Figure 1. Study flowchart

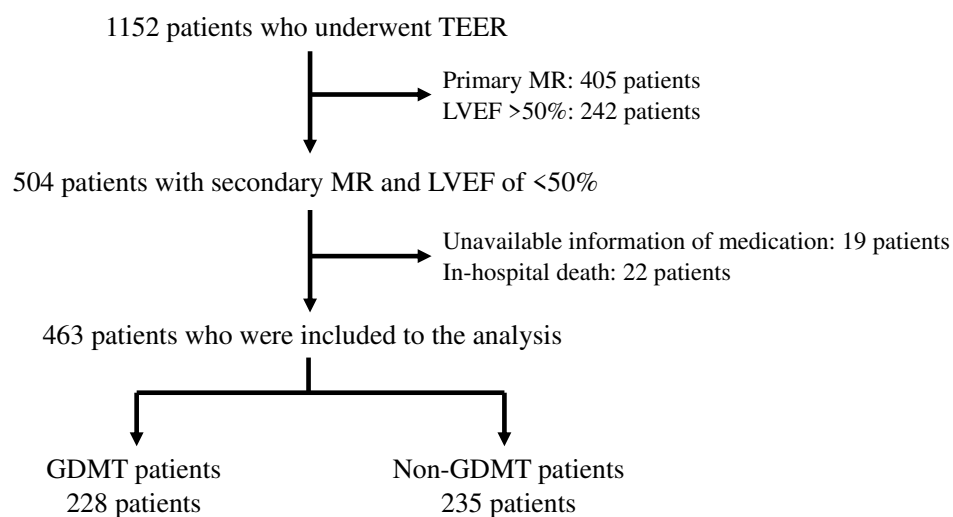

**Legend:** Study flowchart in the present study. TEER = transcatheter edge-to-edge mitral valve repair; MR = mitral regurgitation; LVEF = left-ventricular ejection fraction; GDMT = guideline-directed medical therapy

## Supplemental Figure 2. Distribution of propensity scores for guideline-directed medical therapy

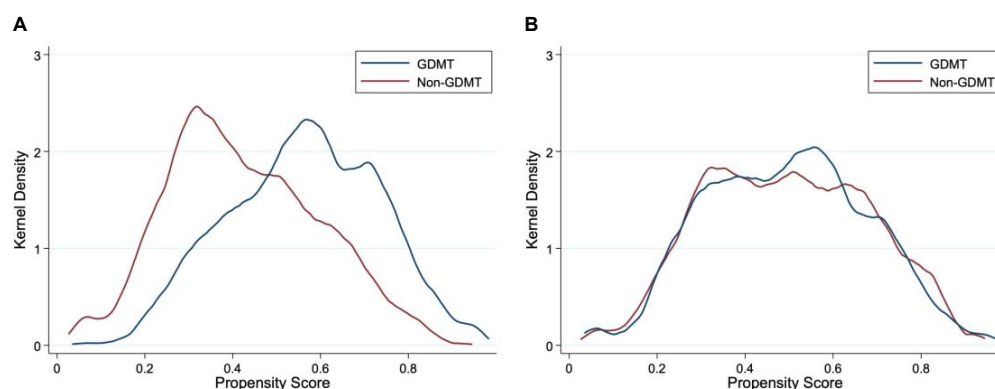

**Legend:** Kernel density plots showing the distributions of propensity scores in patients who received guideline-directed medical therapy (GDMT) and those who did not (A) before and (B) after inverse probability of treatment weighting.

**Supplemental Figure 3. Standardized differences of patient characteristics before and after inverse probability of treatment weighting**

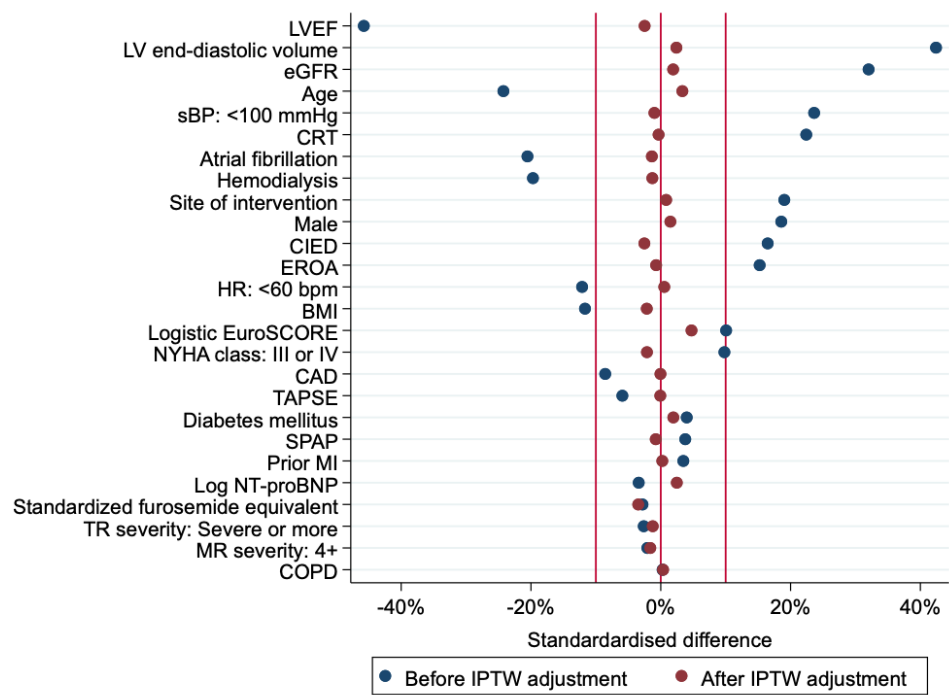

**Legend:** The standardized differences were smaller after inverse probability of treatment weighting. BMI = body mass index; CAD = coronary artery disease; MI = myocardial infarction; COPD = chronic obstructive pulmonary disease; NYHA = New York Heart Association; CIED = cardiac implantable electronic device; CRT = cardiac resynchronization therapy; COPD = chronic obstructive pulmonary disease; eGFR = estimated glomerular filtration rate; BP = blood pressure; HR = heart rate; EuroSCORE = European System for Cardiac Operative Risk Evaluation; MR = mitral regurgitation; EROA = effective regurgitant orifice area; LVEF = left ventricular ejection fraction; LVEDV = left ventricular end-diastolic volume; LVESV = left ventricular end-systolic volume; SPAP = systolic pulmonary artery pressure; TAPSE = tricuspid annular plane systolic excursion; TR = tricuspid regurgitation. NT-proBNP = N-terminal pro-B-type natriuretic peptide, TMVR = transcatheter mitral valve repair.

**Supplemental Table 1. Percentage of missing values in baseline variables**

|                                                                                            | N=463    |
|--------------------------------------------------------------------------------------------|----------|
| Age, n (%)                                                                                 | 0 (0.0)  |
| Male, n (%)                                                                                | 0 (0.0)  |
| BMI, n (%)                                                                                 | 32 (6.9) |
| Diabetes, n (%)                                                                            | 0 (0.0)  |
| CAD, n (%)                                                                                 | 1 (0.2)  |
| Prior MI, n (%)                                                                            | 0 (0.0)  |
| COPD, n (%)                                                                                | 0 (0.0)  |
| CIED, n (%)                                                                                | 0 (0.0)  |
| NYHA class, n (%)                                                                          | 0 (0.0)  |
| Atrial fibrillation, n (%)                                                                 | 1 (0.2)  |
| Systolic BP, n (%)                                                                         | 41 (8.9) |
| HR, n (%)                                                                                  | 39 (8.4) |
| Logistic EuroSCORE, n (%)                                                                  | 0 (0.0)  |
| Site of intervention, n (%)                                                                | 0 (0.0)  |
| eGFR, n (%)                                                                                | 5 (1.1)  |
| Hemodialysis, n (%)                                                                        | 0 (0.0)  |
| NT-proBNP, n (%)                                                                           | 45 (9.7) |
| MR severity, n (%)                                                                         | 5 (1.1)  |
| EROA, n (%)                                                                                | 40 (8.6) |
| LVEF, n (%)                                                                                | 0 (0.0)  |
| LVEDV, n (%)                                                                               | 45 (9.7) |
| SPAP, n (%)                                                                                | 45 (9.7) |
| TAPSE, n (%)                                                                               | 35 (7.6) |
| TR severe or more, n (%)                                                                   | 6 (1.3)  |
| Standardized furosemide equivalent, n (%)                                                  | 1 (0.2)  |
| Post-procedural LVEF, n (%)                                                                | 43 (9.3) |
| Residual MR, n (%)                                                                         | 5 (1.1)  |
| Values are number (%).                                                                     |          |
| Legends: BMI = body mass index; CAD = coronary artery disease; MI = myocardial infarction; |          |
| COPD = chronic obstructive pulmonary disease; NYHA = New York Heart Association; CIED      |          |

---

= cardiac implantable electronic device; eGFR = estimated glomerular filtration rate; BP = blood pressure; HR = heart rate; EuroSCORE = European System for Cardiac Operative Risk Evaluation; MR = mitral regurgitation; EROA = effective regurgitant orifice area; LVEF = left ventricular ejection fraction; LVEDV = left ventricular end-diastolic volume; SPAP = systolic pulmonary artery pressure; TAPSE = tricuspid annular plane systolic excursion; TR = tricuspid regurgitation.

---

**Supplemental Table 2. Procedural and post-procedural findings**

|                          | All<br>n=463      | GDMT<br>n=228     | Non-GDMT<br>n=235 | p value |
|--------------------------|-------------------|-------------------|-------------------|---------|
| Procedural findings      |                   |                   |                   |         |
| Number of clips          | 1.5 ± 0.7         | 1.6 ± 0.7         | 1.5 ± 0.6         | 0.325   |
| Technical success, %     | 98.7              | 98.7              | 98.7              | 1.000   |
| Post-procedural findings |                   |                   |                   |         |
| Residual MR              |                   |                   |                   |         |
| 0 or 1+, %               | 74.7              | 74.0              | 75.3              | 0.767   |
| 2+, %                    | 19.9              | 22.4              | 17.6              | 0.749   |
| 3+ or more, %            | 5.4               | 3.6               | 7.1               | 0.141   |
| Mean MVPG, mmHg          | 3.1 [2.2, 4.4]    | 3.1 [2.1, 4.3]    | 3.1 [2.2, 4.7]    | 0.805   |
| LVEF, %                  | 32.1 [25.0, 41.0] | 29.2 [23.2, 36.6] | 35.6 [27.5, 45.1] | <0.001  |

Values are either %, mean ± SD, or median [interquartile range].

Legend: GDMT = guideline-directed medical therapy; MR = mitral regurgitation; MVPG = mitral valvular pressure gradient; LVEF = left-ventricular ejection fraction.

**Supplemental Table 3. Medical therapy for heart failure before the procedure**

|                                            | All<br>n=463 | GDMT<br>n=228 | Non-GDMT<br>n=235 | p value |
|--------------------------------------------|--------------|---------------|-------------------|---------|
| GDMT                                       | 46.0         | 89.0          | 4.3               | <0.001  |
| Beta-blocker, %                            |              |               |                   | <0.001  |
| None                                       | 10.8         | 4.4           | 17.0              |         |
| 1% to 24%                                  | 8.0          | 8.8           | 7.2               |         |
| 25% to 49%                                 | 24.2         | 28.1          | 20.4              |         |
| 50% to 99%                                 | 37.4         | 37.3          | 37.5              |         |
| 100%                                       | 19.7         | 21.5          | 17.9              |         |
| RAS inhibitor, %                           |              |               |                   | <0.001  |
| None                                       | 22.5         | 6.6           | 37.9              |         |
| 1% to 24%                                  | 12.1         | 17.1          | 7.2               |         |
| 25% to 49%                                 | 28.1         | 33.8          | 22.6              |         |
| 50% to 99%                                 | 25.5         | 30.7          | 20.4              |         |
| 100%                                       | 11.9         | 11.8          | 11.9              |         |
| MRA, %                                     | 56.8         | 91.7          | 23.0              | <0.001  |
| Loop diuretics, %                          | 84.0         | 89.5          | 78.7              | 0.002   |
| Standardized furosemide equivalent, mg/day | 30 [20, 60]  | 40 [20, 60]   | 30 [10, 60]       | 0.100   |

Values are either % or median [interquartile range].

Legends: GDMT = guideline-directed medical therapy; RAS = renin-angiotensin system; MRA = mineralocorticoid receptor antagonist.

**Supplemental Table 4. Univariate and multivariable Cox-proportional hazard analysis for all-cause mortality within two years in the non-weighted population**

|                                            | Univariate analysis |             |         | Multivariable analysis |             |         |
|--------------------------------------------|---------------------|-------------|---------|------------------------|-------------|---------|
|                                            | HR                  | 95%CI       | p value | HR                     | 95%CI       | p value |
| GDMT                                       | 0.58                | 0.38 - 0.89 | 0.012   | 0.52                   | 0.33 - 0.81 | 0.004   |
| Age, years                                 | 1.04                | 1.01 - 1.06 | 0.004   | 1.04                   | 1.01 - 1.07 | 0.014   |
| Male                                       | 1.37                | 0.84 - 2.23 | 0.206   |                        |             |         |
| BMI, kg/m <sup>2</sup>                     | 0.98                | 0.94 - 1.03 | 0.436   |                        |             |         |
| CAD                                        | 1.36                | 0.86 - 2.16 | 0.185   |                        |             |         |
| Prior MI                                   | 1.13                | 0.75 - 1.71 | 0.560   |                        |             |         |
| Diabetes mellitus                          | 1.50                | 0.99 - 2.28 | 0.053   | 1.57                   | 1.03 - 2.40 | 0.036   |
| Atrial fibrillation                        | 0.73                | 0.48 - 1.10 | 0.135   |                        |             |         |
| eGFR, ml/min/1.73m <sup>2</sup>            | 0.98                | 0.97 - 0.99 | 0.003   | 1.00                   | 0.99 - 1.02 | 0.482   |
| Hemodialysis                               | 2.13                | 0.67 - 6.74 | 0.197   |                        |             |         |
| NYHA class: III or IV                      | 1.79                | 0.93 - 3.45 | 0.082   | 1.36                   | 0.69 - 2.66 | 0.370   |
| CIED                                       | 0.96                | 0.64 - 1.44 | 0.840   |                        |             |         |
| CRT                                        | 1.16                | 0.70 - 1.92 | 0.570   |                        |             |         |
| COPD                                       | 1.02                | 0.60 - 1.75 | 0.935   |                        |             |         |
| Logistic EuroSCORE, %                      | 1.00                | 0.99 - 1.02 | 0.506   |                        |             |         |
| Log NT-proBNP                              | 1.80                | 1.50 - 2.17 | <0.001  | 1.59                   | 1.24 - 2.03 | <0.001  |
| Site of intervention                       |                     |             |         |                        |             |         |
| University Hospital Bonn                   | 1 [Ref.]            |             |         |                        |             |         |
| University Hospital Düsseldorf             | 0.72                | 0.43 - 1.20 | 0.202   |                        |             |         |
| University Hospital Cologne                | 1.03                | 0.64 - 1.66 | 0.917   |                        |             |         |
| LVEF, %                                    | 0.99                | 0.96 - 1.01 | 0.362   |                        |             |         |
| LVEDV, ml                                  | 1.00                | 0.99 - 1.00 | 0.949   |                        |             |         |
| EROA, mm <sup>2</sup>                      | 1.00                | 0.98 - 1.02 | 0.834   |                        |             |         |
| MPG, mmHg                                  | 0.98                | 0.80 - 1.19 | 0.804   |                        |             |         |
| TAPSE, mm                                  | 0.94                | 0.90 - 0.99 | 0.022   | 0.98                   | 0.93 - 1.04 | 0.518   |
| SPAP, mmHg                                 | 1.00                | 0.98 - 1.01 | 0.752   |                        |             |         |
| Standardized furosemide equivalent, mg/day | 1.00                | 1.00 - 1.01 | 0.001   | 1.00                   | 0.99 - 1.01 | 0.137   |



|                         |      |             |       |      |             |       |
|-------------------------|------|-------------|-------|------|-------------|-------|
| Residual MR: 2+ or more | 1.58 | 1.04 - 2.41 | 0.032 | 1.28 | 0.83 - 1.98 | 0.266 |
| Post-procedural LVEF, % | 0.98 | 0.96 - 0.99 | 0.035 | 0.98 | 0.96 - 1.00 | 0.115 |

Legend: GDMT = guideline-directed medical therapy; BMI = body mass index; CAD = coronary artery disease; MI = myocardial infarction; NYHA = New York Heart Association; CIED = cardiac implantable electronic device; CRT = cardiac resynchronization therapy; COPD = chronic obstructive pulmonary disease; eGFR = estimated glomerular filtration rate; EuroSCORE = European System for Cardiac Operative Risk Evaluation; MR = mitral regurgitation; EROA = effective regurgitant orifice area; MPG = mean pressure gradient; LVEF = left ventricular ejection fraction; LVEDV = left ventricular end-diastolic volume; SPAP = systolic pulmonary artery pressure; TAPSE = tricuspid annular plane systolic excursion; TR = tricuspid regurgitation.

**Supplemental Table 5. Echocardiographic assessments at one year after transcatheter edge-to-edge mitral valve repair**

|           | All<br>n=192      | GDMT<br>n=108     | Non-GDMT<br>n=84  | p value |
|-----------|-------------------|-------------------|-------------------|---------|
| LVEF, %   | 33.2 [25.8, 41.6] | 31.0 [24.3, 37.0] | 38.0 [30.0, 45.0] | 0.001   |
| LVEDV, ml | 184 [133, 240]    | 189 [136, 250]    | 177 [125, 226]*   | 0.118   |
| LVESV, ml | 117 [79, 172]     | 129 [85, 184]     | 108 [74, 153]*    | 0.018   |
| LVR, %    | 33.9              | 40.2              | 26.8              | 0.038   |

Values are either % or median [interquartile range]. \* p<0.05 vs. baseline

Legend: LVEF = left-ventricular ejection fraction; LVEDV = left-ventricular end-diastolic volume; LVESV = left-ventricular end-systolic volume; LVR = left-ventricular reverse remodeling.

**Supplemental Table 6. Medical therapies at three months and one year after transcatheter edge-to-edge mitral valve repair**

|                                            | All         | GDMT        | Non-GDMT    | p value |
|--------------------------------------------|-------------|-------------|-------------|---------|
| At 3 months                                | n=243       | n=131       | n=112       |         |
| GDMT, %                                    | 49.4        | 85.5        | 7.1         | <0.001  |
| Beta-blockers, %                           |             |             |             | 0.088   |
| None                                       | 4.9         | 1.5         | 8.9         |         |
| 1% to 24%                                  | 7.4         | 6.1         | 8.9         |         |
| 25% to 49%                                 | 27.2        | 29.0        | 25.0        |         |
| 50% to 99%                                 | 37.5        | 38.9        | 35.7        |         |
| 100%                                       | 23.1        | 24.4        | 21.4        |         |
| RAAS inhibitors, %                         |             |             |             | <0.001  |
| None                                       | 21.0        | 6.1         | 38.4        |         |
| 1% to 24%                                  | 17.7        | 23.7        | 10.7        |         |
| 25% to 49%                                 | 23.5        | 26.0        | 20.5        |         |
| 50% to 99%                                 | 30.9        | 35.9        | 25.0        |         |
| 100%                                       | 7.0         | 8.4         | 5.4         |         |
| MRAs, %                                    | 60.1        | 90.8*       | 24.1        | <0.001  |
| Loop diuretic, %                           | 92.6        | 93.9        | 91.1        | 0.393   |
| Standardized furosemide equivalent, mg/day | 40 [20, 60] | 40 [20, 75] | 35 [20, 60] | 0.209   |
| At 1 year                                  | n=195       | n=109       | n=86        |         |
| GDMT, %                                    | 49.2        | 77.1        | 14.0        | <0.001  |
| Beta-blockers, %                           |             |             |             | 0.365   |
| None                                       | 5.6         | 2.8         | 9.3         |         |
| 1% to 24%                                  | 10.8        | 11.0        | 10.5        |         |
| 25% to 49%                                 | 28.7        | 31.2        | 25.6        |         |
| 50% to 99%                                 | 39.5        | 38.5        | 40.7        |         |
| 100%                                       | 15.4        | 16.5        | 14.0        |         |
| RAS inhibitors, %                          |             |             |             | 0.003   |
| None                                       | 18.5        | 9.2         | 30.2        |         |
| 1% to 24%                                  | 21.0        | 23.9        | 17.4        |         |
| 25% to 49%                                 | 23.1        | 22.0        | 24.4        |         |

|                                            |             |             |             |        |
|--------------------------------------------|-------------|-------------|-------------|--------|
| 50% to 99%                                 | 28.2        | 33.9        | 20.9        |        |
| 100%                                       | 9.2         | 11.0        | 7.0         |        |
| MRAs, %                                    | 60.0        | 83.5*       | 30.2*       | <0.001 |
| Loop diuretics, %                          | 90.3        | 94.5        | 84.9        | 0.025  |
| Standardized furosemide equivalent, md/day | 40 [20, 60] | 40 [20, 60] | 30 [10, 50] | 0.059  |

Values are either percent or median [interquartile range]. \* p<0.05 vs. baseline.

Legend: GDMT = guideline-directed medical therapy; RAS = renin-angiotensin- system; MRA = mineralocorticoid receptor antagonist.

**Supplemental Table 7. Comparison of baseline characteristics between patients with completed and lost follow-up**

|                                    | Completed follow-up<br>n=249 | Lost follow-up<br>n=219 | p value |
|------------------------------------|------------------------------|-------------------------|---------|
| Age, years                         | 74 ± 9                       | 74 ± 9                  | 0.651   |
| Female, %                          | 71.5                         | 73.8                    | 0.573   |
| BMI, kg/m <sup>2</sup>             | 26.0 ± 4.5                   | 26.3 ± 4.9              | 0.523   |
| Diabetes, %                        | 35.3                         | 32.7                    | 0.552   |
| Hypertension, %                    | 75.5                         | 80.4                    | 0.209   |
| CAD, %                             | 68.7                         | 65.7                    | 0.501   |
| Prior MI, %                        | 43.0                         | 42.1                    | 0.842   |
| Prior CABG, %                      | 35.3                         | 36                      | 0.886   |
| COPD, %                            | 15.3                         | 21                      | 0.107   |
| CIED, %                            | 55.0                         | 56.1                    | 0.820   |
| CRT, %                             | 16.9                         | 22                      | 0.165   |
| NYHA class III/IV, %               | 83.5                         | 79.9                    | 0.313   |
| Atrial fibrillation, %             | 61.0                         | 63.4                    | 0.606   |
| Systolic BP, mmHg                  | 118 ± 20                     | 120 ± 17                | 0.317   |
| SBP <100 mmHg, %                   | 11.3                         | 7.6                     | 0.233   |
| Diastolic BP, mmHg                 | 68 ± 11                      | 70 ± 11                 | 0.072   |
| HR, bpm                            | 73 ± 13                      | 75 ± 13                 | 0.067   |
| HR <60 bpm, %                      | 11.8                         | 7.7                     | 0.192   |
| Logistic EuroSCORE, %              | 19.5 [10.9, 32.0]            | 20.8 [11.7, 35.4]       | 0.532   |
| Site of intervention               |                              |                         | 0.001   |
| University Hospital Bonn, %        | 45.8                         | 36.5                    |         |
| University Hospital Düsseldorf, %  | 33.7                         | 27.1                    |         |
| University Hospital Cologne, %     | 20.5                         | 36.5                    |         |
| eGFR                               | 44.3 [32.4, 62.0]            | 42.1 [31.5, 58.9]       | 0.809   |
| >60 ml/min/m <sup>2</sup> , %      | 27.7                         | 24.3                    | 0.681   |
| 30 to 60 ml/min/m <sup>2</sup> , % | 50.6                         | 54.2                    |         |
| <30 ml/min/m <sup>2</sup> , %      | 21.7                         | 21.5                    |         |
| Hemodialysis, %                    | 2.4                          | 0.9                     | 0.296   |

|                            |                   |                   |       |
|----------------------------|-------------------|-------------------|-------|
| NT-proBNP, pg/ml           | 4526 [2181, 9872] | 3510 [1874, 6499] | 0.015 |
| Echocardiographic findings |                   |                   |       |
| MR severity                |                   |                   | 0.534 |
| 3+, %                      | 29.7              | 26.9              |       |
| 4+, %                      | 70.3              | 73.1              |       |
| EROA, mm <sup>2</sup>      | 25.0 [20.0, 33.0] | 28.6 [20.0, 38.0] | 0.226 |
| LVEF, %                    | 32.6 [26.0, 40.0] | 32.0 [26.0, 40.1] | 0.718 |
| 40% to 50%, %              | 25.3              | 33.6              | 0.052 |
| LVEDV, ml                  | 168 [134, 219]    | 179 [138, 218]    | 0.326 |
| LVESV, ml                  | 116 [84, 152]     | 123 [89, 157]     | 0.471 |
| LA volume, ml              | 101 [80, 124]     | 100 [78, 125]     | 0.931 |
| SPAP, mmHg                 | 48 ± 16           | 49 ± 16           | 0.404 |
| TAPSE, mm                  | 16 ± 5            | 18 ± 5            | 0.011 |
| TR severe or more, %       | 24.5              | 26.4              | 0.637 |

Values are either %, mean ± SD, or median [interquartile range].

Legends: BMI = body mass index; CAD = coronary artery disease; CABG = coronary artery bypass grafting; MI = myocardial infarction; COPD = chronic obstructive pulmonary disease; NYHA = New York Heart Association; CIED = cardiac implantable electronic device; CRT = cardiac resynchronization therapy; eGFR = estimated glomerular filtration rate; BP = blood pressure; HR = heart rate; EuroSCORE = European System for Cardiac Operative Risk Evaluation; MR = mitral regurgitation; EROA = effective regurgitant orifice area; LVEF = left ventricular ejection fraction; LVEDV = left ventricular end-diastolic volume; LVESV = left ventricular end-systolic volume; LA = left atrium; SPAP = systolic pulmonary artery pressure; TAPSE = tricuspid annular plane systolic excursion; TR = tricuspid regurgitation.
